# Supplementary material for: Corosolic acid ameliorates cardiac hypertrophy via regulating autophagy
Source: Oxford University Press journal article supplement (doi:10.1042/bsr20191860), 2019-11-20
Supplement: bsr-2019-1860_supp.pdf [file bsr-2019-1860_supp.pdf]

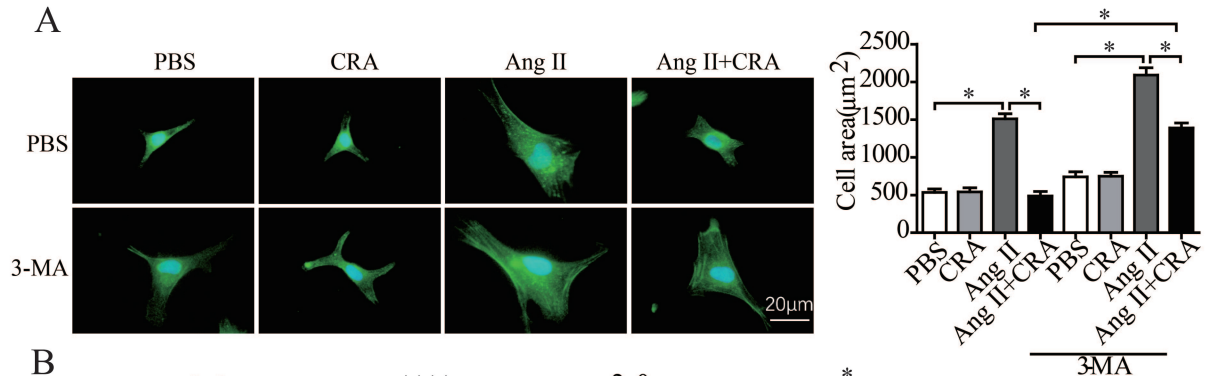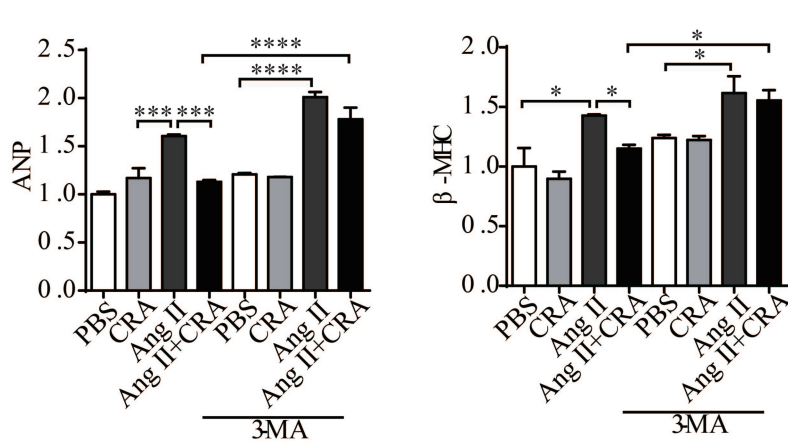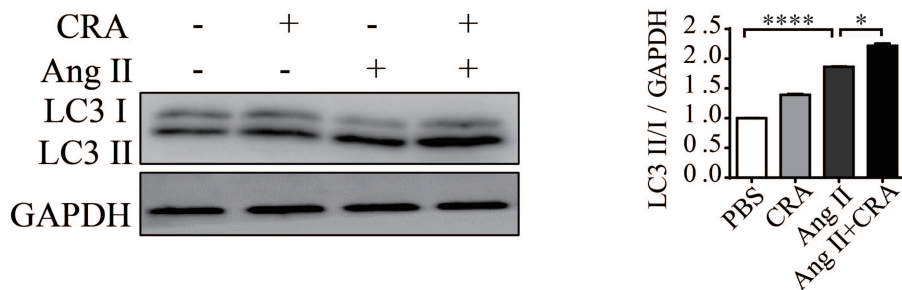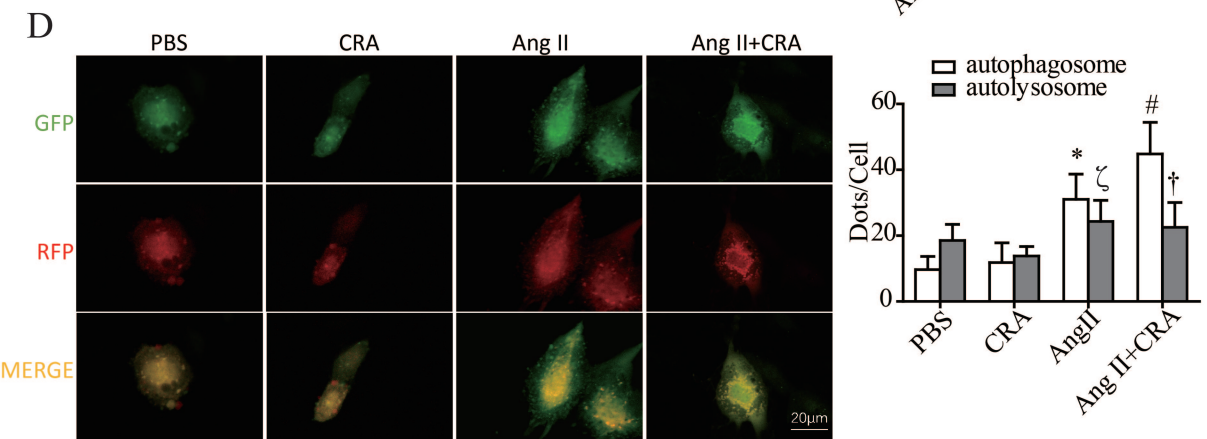

## Figure Legends

Figure S1. CRA blunts cardiomyocyte hypertrophy and promotes autophagy in Ang II-treated H9c2 cells. (A) Representative imaging of immunostaining H9c2 cells for  $\alpha$ -actinin (green) and quantification of cell surface area (n=50+ cells per group) in each group. \*P<0.05, \*\*\*P<0.0005, \*\*\*\*P<0.0001. (B) ANP and  $\beta$ -MHC mRNA levels in H9c2 cells in each group (n=6 per group). \*P<0.05, \*\*\*P<0.0005, \*\*\*\*P<0.0001. (C) Representative blots and quantitative results for LC3 in H9c2 cells in each group (n=4 per group). \*P<0.05, \*\*\*P<0.0005, \*\*\*\*P<0.0001. (D) Autophagy was evaluated by transfection with an adenovirus carrying mCherry-GFP-LC3 in each group (n=30 per group). \*P<0.05 versus PBS group.  $\zeta$  P<0.05 versus PBS group. # P<0.05 versus Ang II group.  $\dagger$ P<0.05 versus Ang II group.
